# Supplementary material for: Layer 6 cortical neurons require Reelin-Dab1 signaling for cellular orientation, Golgi deployment, and directed neurite growth into the marginal zone
Source: PubMed Central journal article supplement (PMC3466444; doi:10.1186/1749-8104-7-25), 2012-07-07

**A**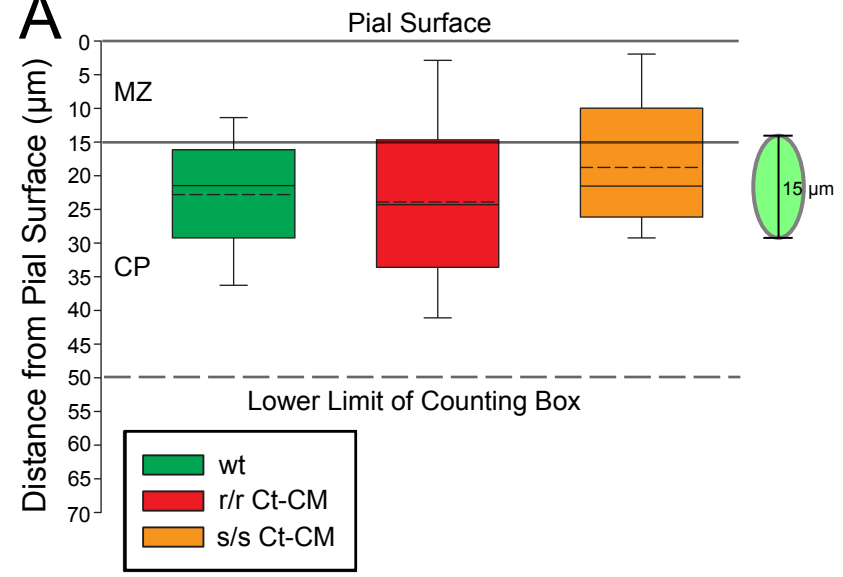

Supplement: 1749-8104-7-25-S10.pdf [file 1749-8104-7-25-S10.pdf]
